# Supplementary material for: Elevated Temperature, Nitrate and Diesel Oil Enhance the Distribution of the Opportunistic Pathogens Scedosporium spp
Source: MDPI journal article supplement (doi:10.3390/jof9040403), 2023-03-24
Supplement: s1 [file s1]

## Supplementary Materials

Table S1. Abundance of *Scedosporium* in soil samples at different incubation temperatures. Values are given in CFU per gram soil (dw).

| Incubation temperature | Incubation period | Mean | Median | Standard deviation | Min | Max |
|------------------------|-------------------|------|--------|--------------------|-----|-----|
| 18 °C                  | 0 wk              | 177  | 143    | 75                 | 95  | 333 |
|                        | 3 wk              | 241  | 244    | 58                 | 190 | 321 |
|                        | 6 wk              | 202  | 190    | 79                 | 95  | 333 |
|                        | 9 wk              | 95   | 95     | 44                 | 48  | 143 |
| 25 °C                  | 0 wk              | 156  | 125    | 113                | 48  | 333 |
|                        | 3 wk              | 219  | 214    | 72                 | 143 | 333 |
|                        | 6 wk              | 256  | 238    | 98                 | 95  | 429 |
|                        | 9 wk              | 143  | 143    | 62                 | 95  | 238 |

Table S2. Abundance of *Scedosporium* concerning different potassium nitrate concentrations (2 % and 4 % w/v) at 18 °C. Values are given in CFU per gram soil (dw).

| KNO <sub>3</sub> (w/v) | Incubation period | Mean value | Median | Standard deviation | Minimum | Maximum |
|------------------------|-------------------|------------|--------|--------------------|---------|---------|
| 2%                     | 0 wk              | 143        | 149    | 83                 | 48      | 286     |
|                        | 3 wk              | 295        | 304    | 105                | 143     | 429     |
|                        | 6 wk              | 125        | 95     | 59                 | 71      | 214     |
|                        | 9 wk              | 153        | 143    | 102                | 36      | 381     |
| 4%                     | 0 wk              | 149        | 125    | 69                 | 71      | 250     |
|                        | 3 wk              | 201        | 238    | 72                 | 48      | 250     |
|                        | 6 wk              | 112        | 107    | 68                 | 48      | 238     |
|                        | 9 wk              | 176        | 179    | 33                 | 143     | 238     |

Table S3. Abundance of *Scedosporium* concerning different potassium nitrate concentrations (2 % and 4 % w/v) at 25 °C. Values are given in CFU per gram soil (dw).

| KNO <sub>3</sub> (w/v) | Incubation period | Mean value | Median | Standard deviation | Minimum | Maximum |
|------------------------|-------------------|------------|--------|--------------------|---------|---------|
| 2%                     | 0 wk              | 147        | 143    | 87                 | 36      | 333     |
|                        | 3 wk              | 372        | 357    | 133                | 238     | 571     |
|                        | 6 wk              | 265        | 250    | 84                 | 143     | 393     |
|                        | 9 wk              | 329        | 327    | 50                 | 238     | 393     |
| 4%                     | 0 wk              | 134        | 143    | 54                 | 48      | 190     |
|                        | 3 wk              | 241        | 238    | 111                | 107     | 333     |
|                        | 6 wk              | 448        | 446    | 81                 | 286     | 571     |

|      |     |     |    |     |     |
|------|-----|-----|----|-----|-----|
| 9 wk | 580 | 589 | 71 | 524 | 667 |
|------|-----|-----|----|-----|-----|

Table S4. Abundance of *Scedosporium/Pseudallescheria* concerning different Diesel concentrations (5 g and 10 g/kg soil) at 18 °C. Values are given in CFU per gram soil (dw).

| Diesel g/kg soil | Incubation period | Mean value | Median | Standard deviation | Minimum | Maximum |
|------------------|-------------------|------------|--------|--------------------|---------|---------|
| <b>5 g</b>       | 0 wk              | 202        | 214    | 76                 | 95      | 286     |
|                  | 3 wk              | 318        | 304    | 88                 | 238     | 476     |
|                  | 6 wk              | 167        | 167    | 109                | 48      | 381     |
|                  | 9 wk              | 129        | 125    | 83                 | 35      | 285     |
| <b>10 g</b>      | 0 wk              | 106        | 107    | 78                 | 0       | 214     |
|                  | 3 wk              | 313        | 327    | 35                 | 250     | 357     |
|                  | 6 wk              | 682        | 643    | 92                 | 571     | 857     |
|                  | 9 wk              | 649        | 619    | 126                | 523     | 892     |

Table S5. Abundance of *Scedosporium/Pseudallescheria* concerning different Diesel concentrations (5 g and 10 g/kg soil) at 25 °C. Values are given in CFU per gram soil (dw).

| Diesel g/kg soil | Incubation period | Mean value | Median | Standard deviation | Minimum | Maximum |
|------------------|-------------------|------------|--------|--------------------|---------|---------|
| <b>5 g</b>       | 0 wk              | 196        | 167    | 96                 | 107     | 381     |
|                  | 3 wk              | 183        | 190    | 81                 | 95      | 321     |
|                  | 6 wk              | 237        | 232    | 101                | 107     | 429     |
|                  | 9 wk              | 384        | 375    | 88                 | 286     | 524     |
| <b>10 g</b>      | 0 wk              | 159        | 196    | 103                | 36      | 286     |
|                  | 3 wk              | 317        | 304    | 116                | 190     | 357     |
|                  | 6 wk              | 1129       | 1119   | 223                | 893     | 1429    |
|                  | 9 wk              | 1594       | 1554   | 189                | 1357    | 1810    |

## Single values (CFU) of the abundance of *Scedosporium*

Table S6. Single values of CFU counted per plate, per millilitre soil suspension and per gram soil (dw) after 0 weeks of incubation of treated pots (**Sampling I**). Concerning parallels 1 to 4, 300 µL soil suspension (1:10) were plated. On parallels 5 to 8, 400 µL soil suspension (1:10) were plated.

|                                                            | Parallels | CFU/plate<br>1:10 | CFU/mL<br>soilsuspension | CFU/g soil<br>(dw) | Mean   | Median | Standard<br>deviation |
|------------------------------------------------------------|-----------|-------------------|--------------------------|--------------------|--------|--------|-----------------------|
| <b>Pot 1</b><br><b>18 °C</b>                               | 1         | 7                 | 23,33                    | 333,33             |        |        |                       |
|                                                            | 2         | 5                 | 16,67                    | 238,10             |        |        |                       |
|                                                            | 2         | 3                 | 10,00                    | 142,86             |        |        |                       |
|                                                            | 4         | 2                 | 6,67                     | 95,24              |        |        |                       |
|                                                            | 5         | 4                 | 10,00                    | 142,86             |        |        |                       |
|                                                            | 6         | 5                 | 12,50                    | 178,57             |        |        |                       |
|                                                            | 7         | 4                 | 10,00                    | 142,86             |        |        |                       |
|                                                            | 8         | 4                 | 10,00                    | 142,86             | 177,08 | 142,86 | 75,14                 |
| <b>Pot 2</b><br><b>18 °C</b><br><b>2 % KNO<sub>3</sub></b> | 1         | 1                 | 3,33                     | 47,62              |        |        |                       |
|                                                            | 2         | 6                 | 20,00                    | 285,71             |        |        |                       |
|                                                            | 3         | 3                 | 10,00                    | 142,86             |        |        |                       |
|                                                            | 4         | 5                 | 16,67                    | 238,10             |        |        |                       |
|                                                            | 5         | 4                 | 10,00                    | 142,86             |        |        |                       |
|                                                            | 6         | 2                 | 5,00                     | 71,43              |        |        |                       |
|                                                            | 7         | 2                 | 5,00                     | 71,43              |        |        |                       |
|                                                            | 8         | 4                 | 10,00                    | 142,86             | 142,86 | 142,86 | 83,45                 |
| <b>Pot 3</b><br><b>18 °C</b><br><b>4 % KNO<sub>3</sub></b> | 1         | 4                 | 13,33                    | 190,48             |        |        |                       |
|                                                            | 2         | 2                 | 6,67                     | 95,24              |        |        |                       |
|                                                            | 3         | 2                 | 6,67                     | 95,24              |        |        |                       |
|                                                            | 4         | 5                 | 16,67                    | 238,10             |        |        |                       |
|                                                            | 5         | 3                 | 7,50                     | 107,14             |        |        |                       |
|                                                            | 6         | 7                 | 17,50                    | 250,00             |        |        |                       |
|                                                            | 7         | 4                 | 10,00                    | 142,86             |        |        |                       |
|                                                            | 8         | 2                 | 5,00                     | 71,43              | 177,08 | 160,71 | 86,89                 |
| <b>Pot 4</b><br><b>18 °C</b><br><b>5 g Diesel</b>          | 1         | 2                 | 6,67                     | 95,24              |        |        |                       |
|                                                            | 2         | 6                 | 20,00                    | 285,71             |        |        |                       |
|                                                            | 3         | 6                 | 20,00                    | 285,71             |        |        |                       |
|                                                            | 4         | 2                 | 6,67                     | 95,24              |        |        |                       |
|                                                            | 5         | 5                 | 12,50                    | 178,57             |        |        |                       |
|                                                            | 6         | 7                 | 17,50                    | 250,00             |        |        |                       |
|                                                            | 7         | 6                 | 15,00                    | 214,29             |        |        |                       |
|                                                            | 8         | 6                 | 15,00                    | 214,29             | 197,92 | 214,29 | 78,18                 |
| <b>Pot 5</b><br><b>18 °C</b><br><b>10 g Diesel</b>         | 1         | 3                 | 10,00                    | 142,86             |        |        |                       |
|                                                            | 2         | 1                 | 3,33                     | 47,62              |        |        |                       |
|                                                            | 3         | 3                 | 10,00                    | 142,86             |        |        |                       |

|                            |   |   |       |        |        |        |        |
|----------------------------|---|---|-------|--------|--------|--------|--------|
|                            | 4 | 4 | 13,33 | 190,48 |        |        |        |
|                            | 5 | 2 | 5,00  | 71,43  |        |        |        |
|                            | 6 | 1 | 2,50  | 35,71  |        |        |        |
|                            | 7 | 6 | 15,00 | 214,29 |        |        |        |
|                            | 8 | 0 | 0,00  | 0,00   | 102,68 | 95,24  | 79,72  |
| <b>Pot 6</b>               | 1 | 1 | 3,33  | 47,62  |        |        |        |
| <b>25 °C</b>               | 2 | 7 | 23,33 | 333,33 |        |        |        |
|                            | 3 | 1 | 3,33  | 47,62  |        |        |        |
|                            | 4 | 6 | 20,00 | 285,71 |        |        |        |
|                            | 5 | 2 | 5,00  | 71,43  |        |        |        |
|                            | 6 | 6 | 15,00 | 214,29 |        |        |        |
|                            | 7 | 5 | 12,50 | 178,57 |        |        |        |
|                            | 8 | 2 | 5,00  | 71,43  | 156,25 | 125,00 | 113,37 |
| <b>Pot 7</b>               | 1 | 7 | 23,33 | 333,33 |        |        |        |
| <b>25 °C</b>               | 2 | 2 | 6,67  | 95,24  |        |        |        |
| <b>2 % KNO<sub>3</sub></b> | 3 | 3 | 10,00 | 142,86 |        |        |        |
|                            | 4 | 3 | 10,00 | 142,86 |        |        |        |
|                            | 5 | 4 | 10,00 | 142,86 |        |        |        |
|                            | 6 | 1 | 2,50  | 35,71  |        |        |        |
|                            | 7 | 5 | 12,50 | 178,57 |        |        |        |
|                            | 8 | 3 | 7,50  | 107,14 | 147,32 | 142,86 | 86,54  |
| <b>Pot 8</b>               | 1 | 4 | 13,33 | 190,48 |        |        |        |
| <b>25 °C</b>               | 2 | 1 | 3,33  | 47,62  |        |        |        |
| <b>4 % KNO<sub>3</sub></b> | 3 | 3 | 10,00 | 142,86 |        |        |        |
|                            | 4 | 4 | 13,33 | 190,48 |        |        |        |
|                            | 5 | 2 | 5,00  | 71,43  |        |        |        |
|                            | 6 | 5 | 12,50 | 178,57 |        |        |        |
|                            | 7 | 3 | 7,50  | 107,14 |        |        |        |
|                            | 8 | 4 | 10,00 | 142,86 | 133,93 | 142,86 | 54,28  |
| <b>Pot 9</b>               | 1 | 3 | 10,00 | 142,86 |        |        |        |
| <b>25 °C</b>               | 2 | 8 | 26,67 | 380,95 |        |        |        |
| <b>5 Diesel</b>            | 3 | 6 | 20,00 | 285,71 |        |        |        |
|                            | 4 | 4 | 13,33 | 190,48 |        |        |        |
|                            | 5 | 3 | 7,50  | 107,14 |        |        |        |
|                            | 6 | 3 | 7,50  | 107,14 |        |        |        |
|                            | 7 | 4 | 10,00 | 142,86 |        |        |        |
|                            | 8 | 6 | 15,00 | 214,29 | 196,43 | 166,67 | 95,66  |
| <b>Pot 10</b>              | 1 | 6 | 20,00 | 285,71 |        |        |        |
| <b>25 °C</b>               | 2 | 5 | 16,67 | 238,10 |        |        |        |
| <b>10 Diesel</b>           | 3 | 5 | 16,67 | 238,10 |        |        |        |
|                            | 4 | 1 | 3,33  | 47,62  |        |        |        |
|                            | 5 | 6 | 15,00 | 214,29 |        |        |        |
|                            | 6 | 1 | 2,50  | 35,71  |        |        |        |
|                            | 7 | 5 | 12,50 | 178,57 |        |        |        |

|   |   |      |       |        |        |        |
|---|---|------|-------|--------|--------|--------|
| 8 | 1 | 2,50 | 35,71 | 159,23 | 196,43 | 103,38 |
|---|---|------|-------|--------|--------|--------|

Table S7. Single values of CFU counted per plate, per millilitre soil suspension and per gram soil (dw) after 3 weeks of incubation of treated pots (**Sampling II**). Concerning parallels 1 to 4, 300 µL soil suspension (1:10) were plated. On parallels 5 to 8, 400 µL soil suspension (1:10) were plated.

|                                                            | Parallels | CFU/plate<br>1:10 | CFU/mL<br>soilsuspension | CFU/g soil<br>(dw) | Mean   | Median | Standard<br>deviation |
|------------------------------------------------------------|-----------|-------------------|--------------------------|--------------------|--------|--------|-----------------------|
| <b>Pot 1</b><br><b>18 °C</b>                               | 1         | 4                 | 13,33                    | 190,48             |        |        |                       |
|                                                            | 2         | 5                 | 16,67                    | 238,10             |        |        |                       |
|                                                            | 2         | 4                 | 13,33                    | 190,48             |        |        |                       |
|                                                            | 4         | 6                 | 20,00                    | 285,71             |        |        |                       |
|                                                            | 5         | 6                 | 15,00                    | 214,29             |        |        |                       |
|                                                            | 6         | 7                 | 17,50                    | 250,00             |        |        |                       |
|                                                            | 7         | 4                 | 10,00                    | 142,86             |        |        |                       |
|                                                            | 8         | 9                 | 22,50                    | 321,43             | 229,17 | 226,19 | 57,18                 |
| <b>Pot 2</b><br><b>18 °C</b><br><b>2 % KNO<sub>3</sub></b> | 1         | 3                 | 10,00                    | 142,86             |        |        |                       |
|                                                            | 2         | 5                 | 16,67                    | 238,10             |        |        |                       |
|                                                            | 3         | 9                 | 30,00                    | 428,57             |        |        |                       |
|                                                            | 4         | 7                 | 23,33                    | 333,33             |        |        |                       |
|                                                            | 5         | 9                 | 22,50                    | 321,43             |        |        |                       |
|                                                            | 6         | 8                 | 20,00                    | 285,71             |        |        |                       |
|                                                            | 7         | 5                 | 12,50                    | 178,57             |        |        |                       |
|                                                            | 8         | 12                | 30,00                    | 428,57             | 260,42 | 261,90 | 135,65                |
| <b>Pot 3</b><br><b>18 °C</b><br><b>4 % KNO<sub>3</sub></b> | 1         | 1                 | 3,33                     | 47,62              |        |        |                       |
|                                                            | 2         | 5                 | 16,67                    | 238,10             |        |        |                       |
|                                                            | 3         | 5                 | 16,67                    | 238,10             |        |        |                       |
|                                                            | 4         | 5                 | 16,67                    | 238,10             |        |        |                       |
|                                                            | 5         | 7                 | 17,50                    | 250,00             |        |        |                       |
|                                                            | 6         | 5                 | 12,50                    | 178,57             |        |        |                       |
|                                                            | 7         | 6                 | 15,00                    | 214,29             |        |        |                       |
|                                                            | 8         | 0                 | 0,00                     | 0,00               | 200,68 | 238,10 | 71,57                 |
| <b>Pot 4</b><br><b>18 °C</b><br><b>5 g Diesel</b>          | 1         | 10                | 33,33                    | 476,19             |        |        |                       |
|                                                            | 2         | 5                 | 16,67                    | 238,10             |        |        |                       |
|                                                            | 3         | 8                 | 26,67                    | 380,95             |        |        |                       |
|                                                            | 4         | 5                 | 16,67                    | 238,10             |        |        |                       |
|                                                            | 5         | 10                | 25,00                    | 357,14             |        |        |                       |
|                                                            | 6         | 10                | 25,00                    | 357,14             |        |        |                       |
|                                                            | 7         | 7                 | 17,50                    | 250,00             |        |        |                       |
|                                                            | 8         | 7                 | 17,50                    | 250,00             | 318,45 | 303,57 | 87,89                 |
| <b>Pot 5</b><br><b>18 °C</b><br><b>10 g Diesel</b>         | 1         | 7                 | 23,33                    | 333,33             |        |        |                       |
|                                                            | 2         | 7                 | 23,33                    | 333,33             |        |        |                       |
|                                                            | 3         | 6                 | 20,00                    | 285,71             |        |        |                       |
|                                                            | 4         | 7                 | 23,33                    | 333,33             |        |        |                       |

|                            |   |            |       |        |        |        |        |
|----------------------------|---|------------|-------|--------|--------|--------|--------|
|                            | 5 | 9          | 22,50 | 321,43 |        |        |        |
|                            | 6 | 7          | 17,50 | 250,00 |        |        |        |
|                            | 7 | 8          | 20,00 | 285,71 |        |        |        |
|                            | 8 | 10         | 25,00 | 357,14 | 312,50 | 327,38 | 35,29  |
| <b>Pot 6</b>               | 1 | 3          | 10,00 | 142,86 |        |        |        |
| <b>25 °C</b>               | 2 | 5          | 16,67 | 238,10 |        |        |        |
|                            | 3 | 9          | 30,00 | 428,57 |        |        |        |
|                            | 4 | 0          | 0,00  | 0,00   |        |        |        |
|                            | 5 | 8          | 20,00 | 285,71 |        |        |        |
|                            | 6 | 5          | 12,50 | 178,57 |        |        |        |
|                            | 7 | 6          | 15,00 | 214,29 |        |        |        |
|                            | 8 | 4          | 10,00 | 142,86 | 232,99 | 214,29 | 100,51 |
| <b>Pot 7</b>               | 1 | 12         | 40,00 | 571,43 |        |        |        |
| <b>25 °C</b>               | 2 | 5          | 16,67 | 238,10 |        |        |        |
| <b>2 % KNO<sub>3</sub></b> | 3 | 11         | 36,67 | 523,81 |        |        |        |
|                            | 4 | 9          | 30,00 | 428,57 |        |        |        |
|                            | 5 | 7          | 17,50 | 250,00 |        |        |        |
|                            | 6 | 8          | 20,00 | 285,71 |        |        |        |
|                            | 7 | 12         | 30,00 | 428,57 |        |        |        |
|                            | 8 | 7          | 17,50 | 250,00 | 372,02 | 357,14 | 133,29 |
| <b>Pot 8</b>               | 1 | 7          | 23,33 | 333,33 |        |        |        |
| <b>25 °C</b>               | 2 | 9          | 30,00 | 428,57 |        |        |        |
| <b>4 % KNO<sub>3</sub></b> | 3 | 4          | 13,33 | 190,48 |        |        |        |
|                            | 4 | 5          | 16,67 | 238,10 |        |        |        |
|                            | 5 | 7          | 17,50 | 250,00 |        |        |        |
|                            | 6 | 4          | 10,00 | 142,86 |        |        |        |
|                            | 7 | 3          | 7,50  | 107,14 |        |        |        |
|                            | 8 | grown over | -     | -      | 241,50 | 238,10 | 110,98 |
| <b>Pot 9</b>               | 1 | 4          | 13,33 | 190,48 |        |        |        |
| <b>25 °C</b>               | 2 | 2          | 6,67  | 95,24  |        |        |        |
| <b>5 Diesel</b>            | 3 | 2          | 6,67  | 95,24  |        |        |        |
|                            | 4 | 4          | 13,33 | 190,48 |        |        |        |
|                            | 5 | 3          | 7,50  | 107,14 |        |        |        |
|                            | 6 | 6          | 15,00 | 214,29 |        |        |        |
|                            | 7 | 7          | 17,50 | 250,00 |        |        |        |
|                            | 8 | 9          | 22,50 | 321,43 | 183,04 | 190,48 | 80,98  |
| <b>Pot 10</b>              | 1 | 6          | 20,00 | 285,71 |        |        |        |
| <b>25 °C</b>               | 2 | 5          | 16,67 | 238,10 |        |        |        |
| <b>10 Diesel</b>           | 3 | 12         | 40,00 | 571,43 |        |        |        |
|                            | 4 | 4          | 13,33 | 190,48 |        |        |        |
|                            | 5 | 7          | 17,50 | 250,00 |        |        |        |
|                            | 6 | 9          | 22,50 | 321,43 |        |        |        |
|                            | 7 | 9          | 22,50 | 321,43 |        |        |        |
|                            | 8 | 10         | 25,00 | 357,14 | 316,96 | 303,57 | 115,94 |

Table S8. Single values of CFU counted per plate, per millilitre soil suspension and per gram soil (dw) after 6 weeks of incubation of treated pots (**Sampling III**). Concerning parallels 1 to 4, 300 µL soil suspension (1:10) were plated. On parallels 5 to 8, 400 µL soil suspension (1:10) were plated.

|                                                            | Parallels | CFU/plate<br>1:10 | CFU/mL<br>soilsuspension | CFU/g soil<br>(dw) | Mean   | Median | Standard<br>deviation |
|------------------------------------------------------------|-----------|-------------------|--------------------------|--------------------|--------|--------|-----------------------|
| <b>Pot 1</b><br><b>18 °C</b>                               | 1         | 4                 | 13,33                    | 190,48             | 202,38 | 190,48 | 79,48                 |
|                                                            | 2         | 5                 | 16,67                    | 238,10             |        |        |                       |
|                                                            | 2         | 2                 | 6,67                     | 95,24              |        |        |                       |
|                                                            | 4         | 3                 | 10,00                    | 142,86             |        |        |                       |
|                                                            | 5         | 4                 | 13,33                    | 190,48             |        |        |                       |
|                                                            | 6         | 3                 | 10,00                    | 142,86             |        |        |                       |
|                                                            | 7         | 7                 | 23,33                    | 333,33             |        |        |                       |
|                                                            | 8         | 6                 | 20,00                    | 285,71             |        |        |                       |
| <b>Pot 2</b><br><b>18 °C</b><br><b>2 % KNO<sub>3</sub></b> | 1         | 2                 | 6,67                     | 95,24              | 125,00 | 95,24  | 59,35                 |
|                                                            | 2         | 3                 | 10,00                    | 142,86             |        |        |                       |
|                                                            | 3         | 2                 | 6,67                     | 95,24              |        |        |                       |
|                                                            | 4         | 2                 | 6,67                     | 95,24              |        |        |                       |
|                                                            | 5         | 2                 | 5,00                     | 71,43              |        |        |                       |
|                                                            | 6         | 2                 | 5,00                     | 71,43              |        |        |                       |
|                                                            | 7         | 6                 | 15,00                    | 214,29             |        |        |                       |
|                                                            | 8         | 6                 | 15,00                    | 214,29             |        |        |                       |
| <b>Pot 3</b><br><b>18 °C</b><br><b>4 % KNO<sub>3</sub></b> | 1         | 1                 | 3,33                     | 47,62              | 111,61 | 107,14 | 67,62                 |
|                                                            | 2         | 5                 | 16,67                    | 238,10             |        |        |                       |
|                                                            | 3         | 3                 | 10,00                    | 142,86             |        |        |                       |
|                                                            | 4         | 3                 | 10,00                    | 142,86             |        |        |                       |
|                                                            | 5         | 2                 | 5,00                     | 71,43              |        |        |                       |
|                                                            | 6         | 4                 | 10,00                    | 142,86             |        |        |                       |
|                                                            | 7         | 1                 | 2,50                     | 35,71              |        |        |                       |
|                                                            | 8         | 2                 | 5,00                     | 71,43              |        |        |                       |
| <b>Pot 4</b><br><b>18 °C</b><br><b>5 g Diesel</b>          | 1         | 4                 | 13,33                    | 190,48             | 166,67 | 166,67 | 109,48                |
|                                                            | 2         | 3                 | 10,00                    | 142,86             |        |        |                       |
|                                                            | 3         | 1                 | 3,33                     | 47,62              |        |        |                       |
|                                                            | 4         | 8                 | 26,67                    | 380,95             |        |        |                       |
|                                                            | 5         | 6                 | 15,00                    | 214,29             |        |        |                       |
|                                                            | 6         | 6                 | 15,00                    | 214,29             |        |        |                       |
|                                                            | 7         | 2                 | 5,00                     | 71,43              |        |        |                       |
|                                                            | 8         | 2                 | 5,00                     | 71,43              |        |        |                       |
| <b>Pot 5</b><br><b>18 °C</b><br><b>10 g Diesel</b>         | 1         | 15                | 50,00                    | 714,29             |        |        |                       |
|                                                            | 2         | 13                | 43,33                    | 619,05             |        |        |                       |
|                                                            | 3         | 16                | 53,33                    | 761,90             |        |        |                       |
|                                                            | 4         | 18                | 60,00                    | 857,14             |        |        |                       |

|                            |   |    |        |         |         |        |        |
|----------------------------|---|----|--------|---------|---------|--------|--------|
|                            | 5 | 16 | 40,00  | 571,43  |         |        |        |
|                            | 6 | 18 | 45,00  | 642,86  |         |        |        |
|                            | 7 | 18 | 45,00  | 642,86  |         |        |        |
|                            | 8 | 18 | 45,00  | 642,86  | 681,55  | 642,86 | 91,72  |
| <b>Pot 6</b>               | 1 | 4  | 13,33  | 190,48  |         |        |        |
| <b>25 °C</b>               | 2 | 5  | 16,67  | 238,10  |         |        |        |
|                            | 3 | 6  | 20,00  | 285,71  |         |        |        |
|                            | 4 | 2  | 6,67   | 95,24   |         |        |        |
|                            | 5 | 5  | 16,67  | 238,10  |         |        |        |
|                            | 6 | 9  | 30,00  | 428,57  |         |        |        |
|                            | 7 | 7  | 23,33  | 333,33  |         |        |        |
|                            | 8 | 5  | 16,67  | 238,10  | 255,95  | 238,10 | 98,38  |
| <b>Pot 7</b>               | 1 | 5  | 16,67  | 238,10  |         |        |        |
| <b>25 °C</b>               | 2 | 3  | 10,00  | 142,86  |         |        |        |
| <b>2 % KNO<sub>3</sub></b> | 3 | 7  | 23,33  | 333,33  |         |        |        |
|                            | 4 | 7  | 23,33  | 333,33  |         |        |        |
|                            | 5 | 7  | 17,50  | 250,00  |         |        |        |
|                            | 6 | 5  | 12,50  | 178,57  |         |        |        |
|                            | 7 | 11 | 27,50  | 392,86  |         |        |        |
|                            | 8 | 7  | 17,50  | 250,00  | 264,88  | 250,00 | 83,88  |
| <b>Pot 8</b>               | 1 | 10 | 33,33  | 476,19  |         |        |        |
| <b>25 °C</b>               | 2 | 12 | 40,00  | 571,43  |         |        |        |
| <b>4 % KNO<sub>3</sub></b> | 3 | 9  | 30,00  | 428,57  |         |        |        |
|                            | 4 | 9  | 30,00  | 428,57  |         |        |        |
|                            | 5 | 13 | 32,50  | 464,29  |         |        |        |
|                            | 6 | 12 | 30,00  | 428,57  |         |        |        |
|                            | 7 | 14 | 35,00  | 500,00  |         |        |        |
|                            | 8 | 8  | 20,00  | 285,71  | 447,92  | 446,43 | 81,48  |
| <b>Pot 9</b>               | 1 | 3  | 10,00  | 142,86  |         |        |        |
| <b>25 °C</b>               | 2 | 9  | 30,00  | 428,57  |         |        |        |
| <b>5 Diesel</b>            | 3 | 6  | 20,00  | 285,71  |         |        |        |
|                            | 4 | 6  | 20,00  | 285,71  |         |        |        |
|                            | 5 | 7  | 17,50  | 250,00  |         |        |        |
|                            | 6 | 6  | 15,00  | 214,29  |         |        |        |
|                            | 7 | 5  | 12,50  | 178,57  |         |        |        |
|                            | 8 | 3  | 7,50   | 107,14  | 236,61  | 232,14 | 100,90 |
| <b>Pot 10</b>              | 1 | 19 | 63,33  | 904,76  |         |        |        |
| <b>25 °C</b>               | 2 | 24 | 80,00  | 1142,86 |         |        |        |
| <b>10 Diesel</b>           | 3 | 27 | 90,00  | 1285,71 |         |        |        |
|                            | 4 | 23 | 76,67  | 1095,24 |         |        |        |
|                            | 5 | 39 | 97,50  | 1392,86 |         |        |        |
|                            | 6 | 40 | 100,00 | 1428,57 |         |        |        |
|                            | 7 | 25 | 62,50  | 892,86  |         |        |        |
|                            | 8 | 25 | 62,50  | 892,86  | 1129,46 | 1119,0 | 222,67 |



Table S9. Single values of CFU counted per plate, per millilitre soil suspension and per gram soil (dw) after 9 weeks of incubation of treated pots (**Sampling IV**). Concerning parallels 1 to 4, 300 µL soil suspension (1:10) were plated. On parallels 5 to 8, 400 µL soil suspension (1:10) were plated.

|                                                            | Parallels | CFU/plate<br>1:10 | CFU/mL<br>soilsuspension | CFU/g soil<br>(dw) | Mean   | Median | Standard<br>deviation |
|------------------------------------------------------------|-----------|-------------------|--------------------------|--------------------|--------|--------|-----------------------|
| <b>Pot 1</b><br><b>18 °C</b>                               | 1         | 1                 | 3,33                     | 47,62              |        |        |                       |
|                                                            | 2         | 1                 | 3,33                     | 47,62              |        |        |                       |
|                                                            | 2         | 3                 | 10,00                    | 142,86             |        |        |                       |
|                                                            | 4         | 3                 | 10,00                    | 142,86             |        |        |                       |
|                                                            | 5         | 2                 | 6,67                     | 95,24              |        |        |                       |
|                                                            | 6         | 3                 | 10,00                    | 142,86             |        |        |                       |
|                                                            | 7         | 1                 | 3,33                     | 47,62              |        |        |                       |
|                                                            | 8         | 2                 | 6,67                     | 95,24              | 95,24  | 95,24  | 44,09                 |
| <b>Pot 2</b><br><b>18 °C</b><br><b>2 % KNO<sub>3</sub></b> | 1         | 8                 | 26,67                    | 380,95             |        |        |                       |
|                                                            | 2         | 3                 | 10,00                    | 142,86             |        |        |                       |
|                                                            | 3         | 3                 | 10,00                    | 142,86             |        |        |                       |
|                                                            | 4         | 2                 | 6,67                     | 95,24              |        |        |                       |
|                                                            | 5         | 3                 | 7,50                     | 107,14             |        |        |                       |
|                                                            | 6         | 5                 | 12,50                    | 178,57             |        |        |                       |
|                                                            | 7         | 4                 | 10,00                    | 142,86             |        |        |                       |
|                                                            | 8         | 1                 | 2,50                     | 35,71              | 153,27 | 142,86 | 101,50                |
| <b>Pot 3</b><br><b>18 °C</b><br><b>4 % KNO<sub>3</sub></b> | 1         | 5                 | 16,67                    | 238,10             |        |        |                       |
|                                                            | 2         | 4                 | 13,33                    | 190,48             |        |        |                       |
|                                                            | 3         | 3                 | 10,00                    | 142,86             |        |        |                       |
|                                                            | 4         | 4                 | 13,33                    | 190,48             |        |        |                       |
|                                                            | 5         | 4                 | 10,00                    | 142,86             |        |        |                       |
|                                                            | 6         | 5                 | 12,50                    | 178,57             |        |        |                       |
|                                                            | 7         | 4                 | 10,00                    | 142,86             |        |        |                       |
|                                                            | 8         | 5                 | 12,50                    | 178,57             | 175,60 | 178,57 | 32,91                 |
| <b>Pot 4</b><br><b>18 °C</b><br><b>5 g Diesel</b>          | 1         | 2                 | 6,67                     | 95,24              |        |        |                       |
|                                                            | 2         | 4                 | 13,33                    | 190,48             |        |        |                       |
|                                                            | 3         | 3                 | 10,00                    | 142,86             |        |        |                       |
|                                                            | 4         | 6                 | 20,00                    | 285,71             |        |        |                       |
|                                                            | 5         | 1                 | 2,50                     | 35,71              |        |        |                       |
|                                                            | 6         | 4                 | 10,00                    | 142,86             |        |        |                       |
|                                                            | 7         | 3                 | 7,50                     | 107,14             |        |        |                       |
|                                                            | 8         | 1                 | 2,50                     | 35,71              | 129,46 | 125,00 | 82,59                 |
| <b>Pot 5</b><br><b>18 °C</b><br><b>10 g Diesel</b>         | 1         | 11                | 36,67                    | 523,81             |        |        |                       |
|                                                            | 2         | 12                | 40,00                    | 571,43             |        |        |                       |
|                                                            | 3         | 14                | 46,67                    | 666,67             |        |        |                       |
|                                                            | 4         | 12                | 40,00                    | 571,43             |        |        |                       |
|                                                            | 5         | 15                | 37,50                    | 535,71             |        |        |                       |

|                            |   |    |        |         |         |         |        |
|----------------------------|---|----|--------|---------|---------|---------|--------|
|                            | 6 | 19 | 47,50  | 678,57  |         |         |        |
|                            | 7 | 21 | 52,50  | 750,00  |         |         |        |
|                            | 8 | 25 | 62,50  | 892,86  | 648,81  | 619,05  | 126,15 |
| <b>Pot 6</b>               | 1 | 4  | 13,33  | 190,48  |         |         |        |
| <b>25 °C</b>               | 2 | 2  | 6,67   | 95,24   |         |         |        |
|                            | 3 | 3  | 10,00  | 142,86  |         |         |        |
|                            | 4 | 3  | 10,00  | 142,86  |         |         |        |
|                            | 5 | 2  | 6,67   | 95,24   |         |         |        |
|                            | 6 | 4  | 13,33  | 190,48  |         |         |        |
|                            | 7 | 5  | 16,67  | 238,10  |         |         |        |
|                            | 8 | 1  | 3,33   | 47,62   | 142,86  | 142,86  | 62,35  |
| <b>Pot 7</b>               | 1 | 8  | 26,67  | 380,95  |         |         |        |
| <b>25 °C</b>               | 2 | 7  | 23,33  | 333,33  |         |         |        |
| <b>2 % KNO<sub>3</sub></b> | 3 | 6  | 20,00  | 285,71  |         |         |        |
|                            | 4 | 5  | 16,67  | 238,10  |         |         |        |
|                            | 5 | 9  | 22,50  | 321,43  |         |         |        |
|                            | 6 | 11 | 27,50  | 392,86  |         |         |        |
|                            | 7 | 9  | 22,50  | 321,43  |         |         |        |
|                            | 8 | 10 | 25,00  | 357,14  | 328,87  | 327,38  | 50,48  |
| <b>Pot 8</b>               | 1 | 11 | 36,67  | 523,81  |         |         |        |
| <b>25 °C</b>               | 2 | 12 | 40,00  | 571,43  |         |         |        |
| <b>4 % KNO<sub>3</sub></b> | 3 | 14 | 46,67  | 666,67  |         |         |        |
|                            | 4 | 14 | 46,67  | 666,67  |         |         |        |
|                            | 5 | 13 | 32,50  | 464,29  |         |         |        |
|                            | 6 | 17 | 42,50  | 607,14  |         |         |        |
|                            | 7 | 17 | 42,50  | 607,14  |         |         |        |
|                            | 8 | 15 | 37,50  | 535,71  | 580,36  | 589,29  | 70,79  |
| <b>Pot 9</b>               | 1 | 11 | 36,67  | 523,81  |         |         |        |
| <b>25 °C</b>               | 2 | 9  | 30,00  | 428,57  |         |         |        |
| <b>5 Diesel</b>            | 3 | 10 | 33,33  | 476,19  |         |         |        |
|                            | 4 | 6  | 20,00  | 285,71  |         |         |        |
|                            | 5 | 9  | 22,50  | 321,43  |         |         |        |
|                            | 6 | 10 | 25,00  | 357,14  |         |         |        |
|                            | 7 | 8  | 20,00  | 285,71  |         |         |        |
|                            | 8 | 11 | 27,50  | 392,86  | 383,93  | 375,00  | 87,89  |
| <b>Pot 10</b>              | 1 | 38 | 126,67 | 1809,52 |         |         |        |
| <b>25 °C</b>               | 2 | 33 | 110,00 | 1571,43 |         |         |        |
| <b>10 Diesel</b>           | 3 | 32 | 106,67 | 1523,81 |         |         |        |
|                            | 4 | 38 | 126,67 | 1809,52 |         |         |        |
|                            | 5 | 43 | 107,50 | 1535,71 |         |         |        |
|                            | 6 | 50 | 125,00 | 1785,71 |         |         |        |
|                            | 7 | 38 | 95,00  | 1357,14 |         |         |        |
|                            | 8 | 38 | 95,00  | 1357,14 | 1593,75 | 1553,57 | 189,24 |
